# Supplementary material for: Optimization of a polydopamine (PD)-based coating method and polydimethylsiloxane (PDMS) substrates for improved mouse embryonic stem cell (ESC) pluripotency maintenance and cardiac differentiation
Source: Royal Society of Chemistry journal article supplement (doi:10.1039/c7bm00266a), 2017-01-01

**Fig. S1** LIVE/DEAD staining of ESCs on the PDMS surface coated with PD and gelatin from day 1 to day 7. Green color indicates live cells and red color indicates dead cells.

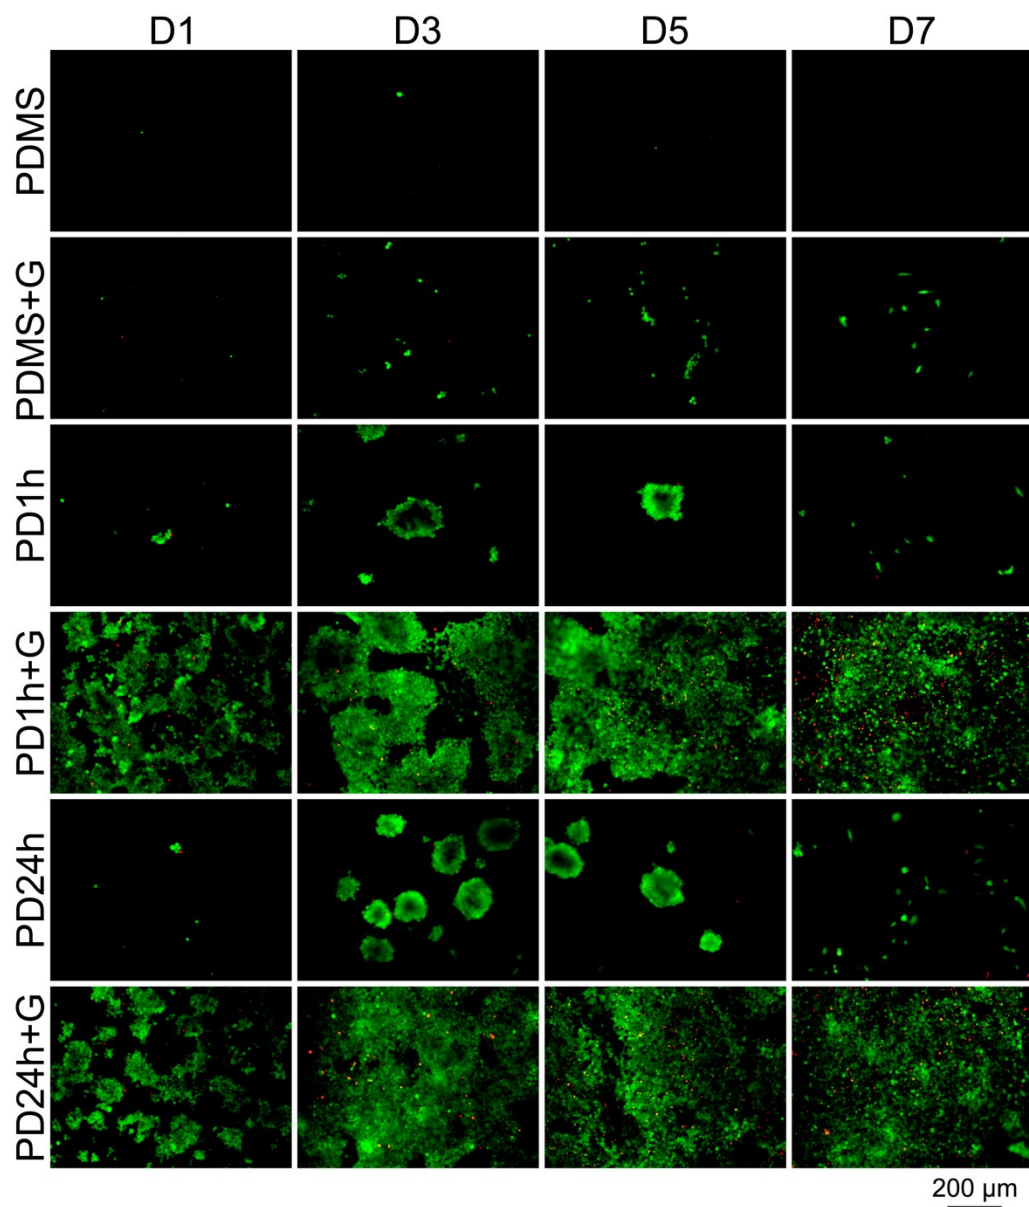

**Fig. S2** Water contact angle (a) and Protein adsorption (b) on the PDMS surface coated with PD and gelatin. The data are presented as the mean  $\pm$  standard deviation (n=6). \* indicates  $p < 0.05$ ; \*\* indicates  $p < 0.01$ .

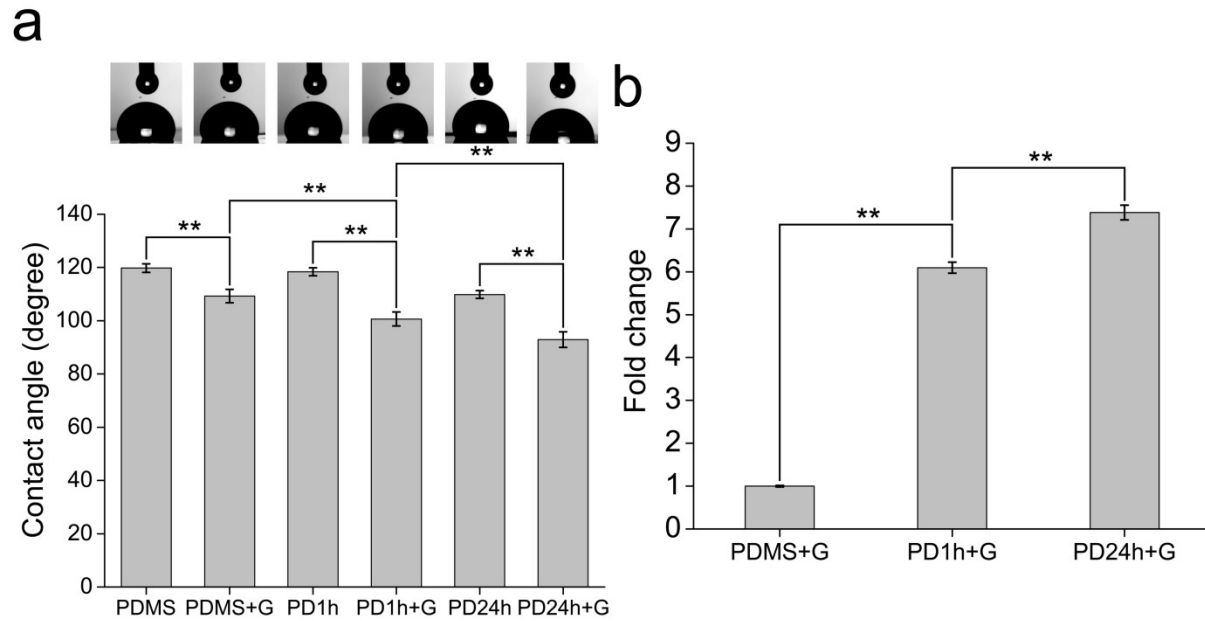

Supplement: c7bm00266a1.pdf [file c7bm00266a1.pdf]
